# Supplementary material for: Two-dimensional magnetic behaviour in hybrid NiFe-layered double hydroxides by molecular engineering
Source: Royal Society of Chemistry journal article supplement (doi:10.1039/d2dt03804h), 2022-12-21
Supplement: d2dt03804h1.pdf [file d2dt03804h1.pdf]

## **Two-dimensional magnetic behaviour in hybrid NiFe-layered double hydroxides by molecular engineering**

Alvaro Seijas-Da Silva,<sup>a</sup> Jose Alberto Carrasco<sup>a</sup>, Bruno J. C. Vieira<sup>b</sup>, João C. Waerenborgh<sup>b</sup>, Eugenio Coronado<sup>a\*</sup>, Gonzalo Abellán<sup>a\*</sup>

<sup>a</sup> Instituto de Ciencia Molecular (ICMol), Universidad de Valencia, Catedrático José Beltrán Martínez, 2, 46980 Paterna, Spain.

<sup>b</sup> Centro de Ciências e Tecnologias Nucleares (C2TN), Instituto Superior Técnico, Universidade de Lisboa, 2695-066 Bobadela LRS, Portugal.

## **Experimental part.**

### **Anion exchange reaction.**

#### **Synthesis of NiFe-SO<sub>4</sub> LDH.**

Sodium sulphate (0.25 M) was dissolved in 50 mL of a 1:1 (v/v) ethanol/water mixture with magnetic stirring at 65 °C and under argon atmosphere. After 30 min, 50 mg of LDH NiFe-Cl were added. The temperature was set at 50 °C, and the reaction was kept for 48 h. Finally, the mixture was filtered, washed with Milli-Q water and EtOH, and dried in vacuum.

#### **Synthesis of NiFe-ES LDH.**

Sodium ethyl sulphate (ES; 7.5 mM) was dissolved in 50 mL of a 1:1 (v/v) ethanol/water mixture. Then, 50 mg of NiFe-Cl LDH were added, and the reaction was maintained for 48 h at room temperature under Ar atmosphere and magnetic stirring. Finally, the final mixture was filtered, and the yellow powder was washed with Milli-Q water and EtOH several times and dried during 24 h in vacuum.

#### **Synthesis of NiFe-OS LDH.**

Sodium octyl sulphate (OS; 7.5 mM) was dissolved in 50 mL of a 1:1 (v/v) ethanol/water mixture. Then, 30 mg of NiFe-Cl LDH were added, and the reaction was maintained for 48 h at room temperature under Ar atmosphere and magnetic stirring. Finally, the final mixture was filtered, and the yellow powder was washed with Milli-Q water and EtOH several times and dried during 24 h in vacuum.

#### **Synthesis of NiFe-DS LDH.**

Sodium dodecyl sulphate (DS; 0.1 M) was dissolved in 50 mL of a 1:1 (v/v) ethanol/water mixture. Then, 200 mg of NiFe-Cl LDH were added, and the reaction was maintained for 12 h at room temperature under Ar atmosphere and magnetic stirring. Finally, the final mixture was filtered, and the yellow powder was washed with Milli-Q water and EtOH several times and dried during 24 h in vacuum.

#### **Synthesis of NiFe-HDS LDH.**

Sodium hexadecyl sulphate (HDS; 2.5 mM) was dissolved in 50 mL of a 1:1 (v/v) ethanol/water mixture. Then, 50 mg of NiFe-Cl LDH were added, and the reaction was maintained for 12 h at room temperature under Ar atmosphere and magnetic stirring. Finally, the final mixture was filtered, and the yellow powder was washed with Milli-Q water and EtOH several times and dried during 24 h in vacuum.

#### **Synthesis of NiFe-ODS LDH.**

Sodium octadecyl sulphate (ODS; 0.01 M) was dissolved in 50 mL of a 1:1 (v/v) ethanol/water mixture. Then, 200 mg of NiFe-Cl LDH were added, and the reaction was maintained for 12 h at room temperature under Ar atmosphere and magnetic stirring. Finally, the final mixture was filtered, and the yellow powder was washed with Milli-Q water and EtOH several times and dried during 24 h in vacuum.

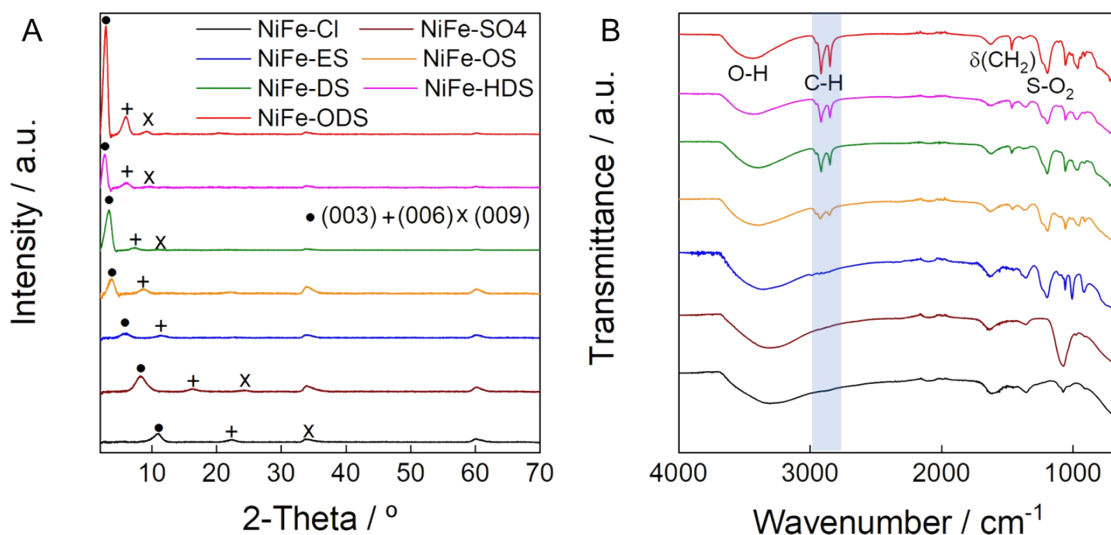

**Figure S1.** (A) XRPD diffractograms highlighting the main basal reflections and (B) IR spectra of the NiFe-LDH family.

LDH phases were confirmed via XRPD pattern, highlighting the main basal reflections that can be found in hydrotalcite-like materials (JCPDS 22-700).<sup>1</sup> The main (003), (006) and (009) peaks are related to the basal space of the LDH, hence dependent on the size of the interlayer anion. These peaks exhibit a shift towards lower 2- $\theta$  values as long as the length of the interlayer anion rises, indicative of a larger interlayer space.<sup>2</sup> At the same time, when the length of the interlayer surfactant rises, the intensity of these peaks increases due to a greater ordering in the c axis direction corresponding to a higher number of tail to tail interactions, which favours the stabilization of the system.<sup>3,4</sup> For the pristine NiFe-Cl, we observe a basal space of around 8.0 Å, in good agreement with that found in the literature.<sup>2</sup> For the longest interlayer distance (NiFe-ODS) the basal space increases up to 31.6 Å, confirming the successful anion exchange reaction.<sup>4</sup>

ATR-FTIR spectroscopy also confirm the nature of the interlayer anion, highlighting the C-H stretching bands at 2917 and 2845 cm<sup>-1</sup> and the sulphate bands at ca. 1190 and 1050 cm<sup>-1</sup> in the surfactant-intercalated samples and at ca. 1100 cm<sup>-1</sup> in the sulphate sample.<sup>5</sup>

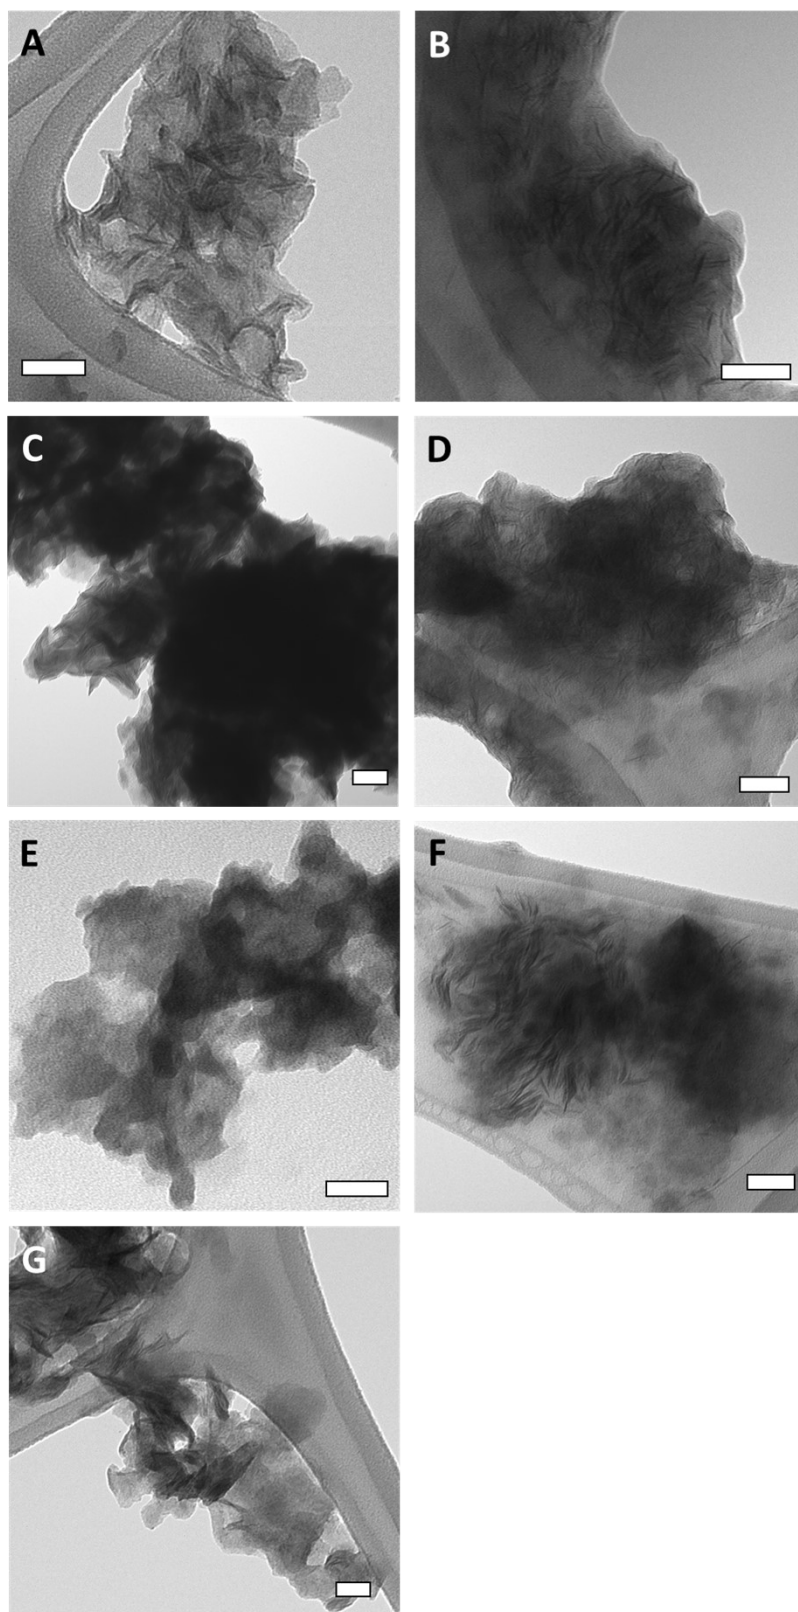

**Figure S2.** TEM images of the NiFe-LDHs. A) NiFe-Cl, B) NiFe-SO<sub>4</sub>, C) NiFe-ES, D) NiFe-OS, E) NiFe-DS, F) NiFe-HDS and G) NiFe-ODS. Scale bar: 50 nm.

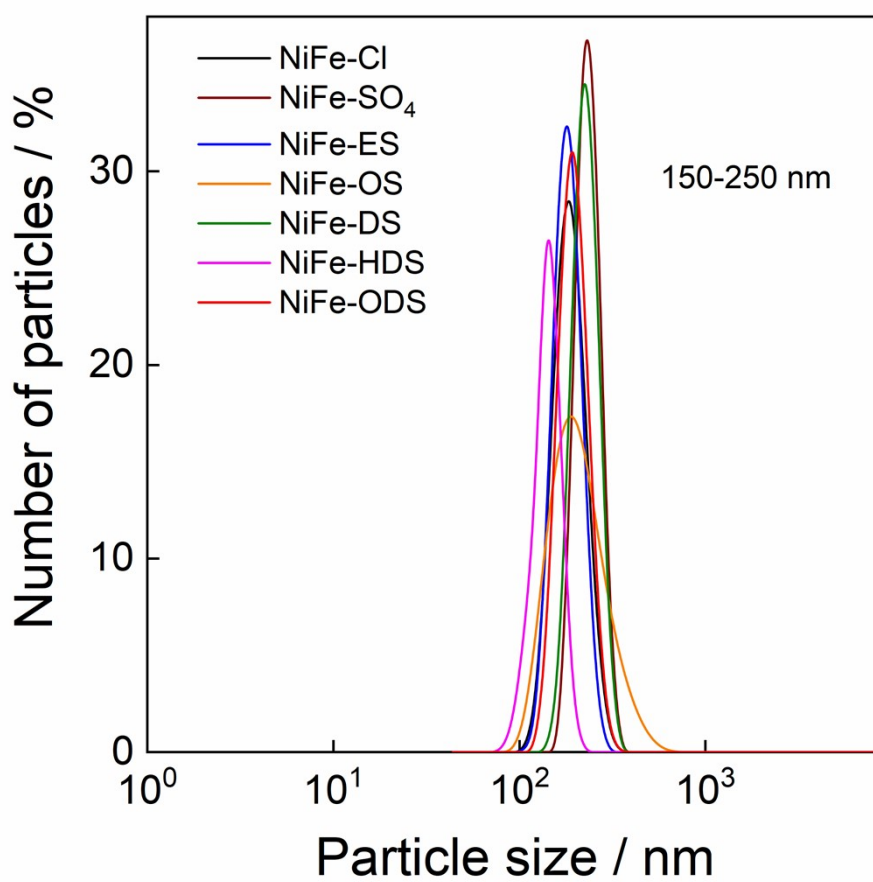

**Figure S3.** DLS measurements of NiFe-LDH family denoting the average size of the particles.

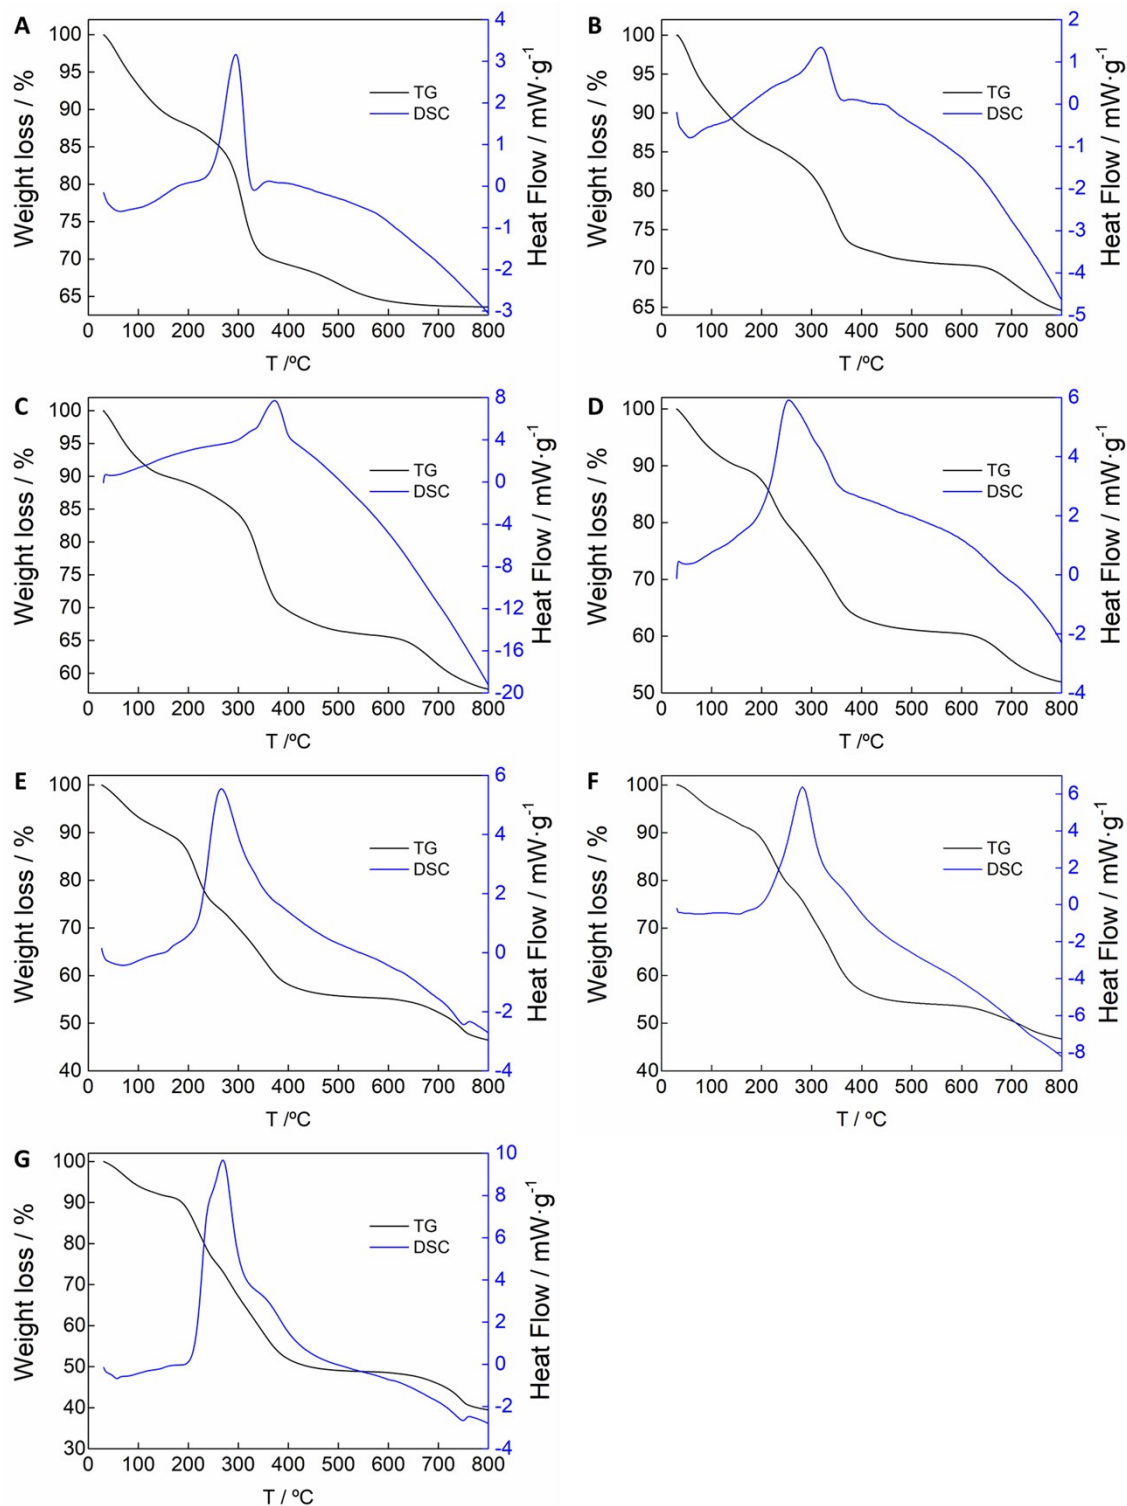

**Figure S4.** Thermogravimetric analysis for the as-synthesized LDHs. A) NiFe-Cl, B) NiFe-SO<sub>4</sub>, C) NiFe-ES, D) NiFe-OS, E) NiFe-DS, F) NiFe-HDS and G) NiFe-ODS.

**Table S1.** Elemental analysis of NiFe–LDH family and metallic ratio by EDX.

| Sample               | C <sub>found</sub> | H <sub>found</sub> | N <sub>found</sub> | S <sub>found</sub> | C <sub>calculated</sub> | H <sub>calculated</sub> | N <sub>calculated</sub> | S <sub>calculated</sub> | Ratio Ni/Fe |
|----------------------|--------------------|--------------------|--------------------|--------------------|-------------------------|-------------------------|-------------------------|-------------------------|-------------|
| NiFe–Cl              | 3.24               | 3.32               | 0.65               | 0.17               | 3.29                    | 3.21                    | 0.00                    | 0.00                    | 2.73        |
| NiFe–SO <sub>4</sub> | 5.20               | 3.34               | 0.42               | 2.98               | 5.14                    | 3.37                    | 0.00                    | 3.56                    | 2.75        |
| NiFe–ES              | 6.60               | 3.63               | 0.59               | 3.42               | 6.68                    | 3.66                    | 0.00                    | 4.09                    | 2.68        |
| NiFe–OS              | 13.01              | 4.34               | 0.56               | 3.84               | 13.09                   | 4.53                    | 0.00                    | 4.36                    | 2.85        |
| NiFe–DS              | 19.26              | 5.30               | 0.34               | 3.85               | 19.46                   | 5.38                    | 0.00                    | 4.33                    | 2.74        |
| NiFe–HDS             | 23.49              | 5.57               | 0.35               | 3.52               | 23.70                   | 5.87                    | 0.00                    | 3.95                    | 2.81        |
| NiFe–ODS             | 27.44              | 6.33               | 0.32               | 3.45               | 27.01                   | 6.73                    | 0.00                    | 3.65                    | 2.86        |

Note: the calculated data correspond to the estimated molecular formulas.

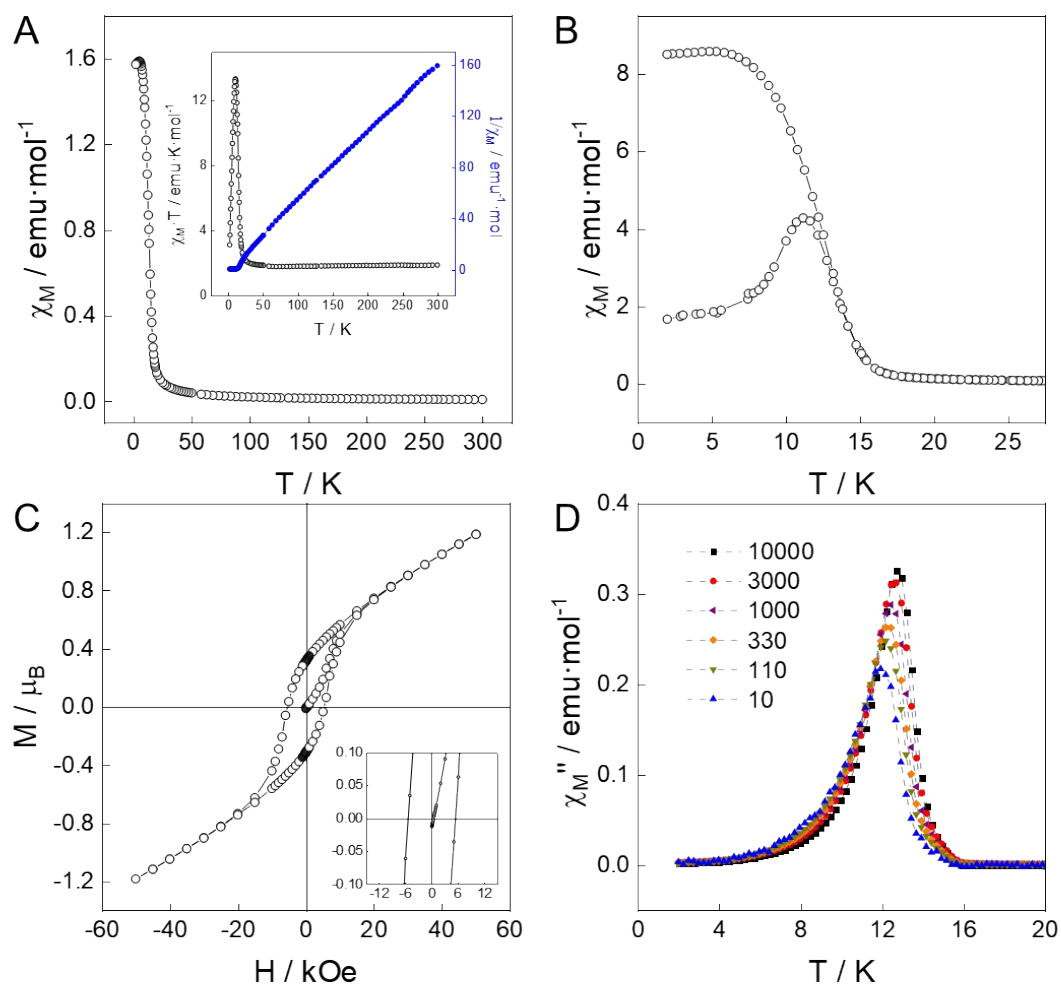

**Figure S5.** Magnetic properties of the NiFe-SO<sub>4</sub> sample. (A)  $\chi_M$  vs. T with an external applied field of 1000 Oe. The inset represents the thermal dependence of  $\chi_M \cdot T$  and the fitting of the  $\chi_M^{-1}$  to a Curie–Weiss law; (B) FC/ZFC with an external applied field of 100 Oe. (C) Hysteresis cycle at 2 K. The inset shows a zoom of the low field region; (D) frequency dependence with the temperature for the out-of-phase ( $\chi_M''$ ) signals at 10, 110, 330, 1000, 3000 and 100000 Hz.



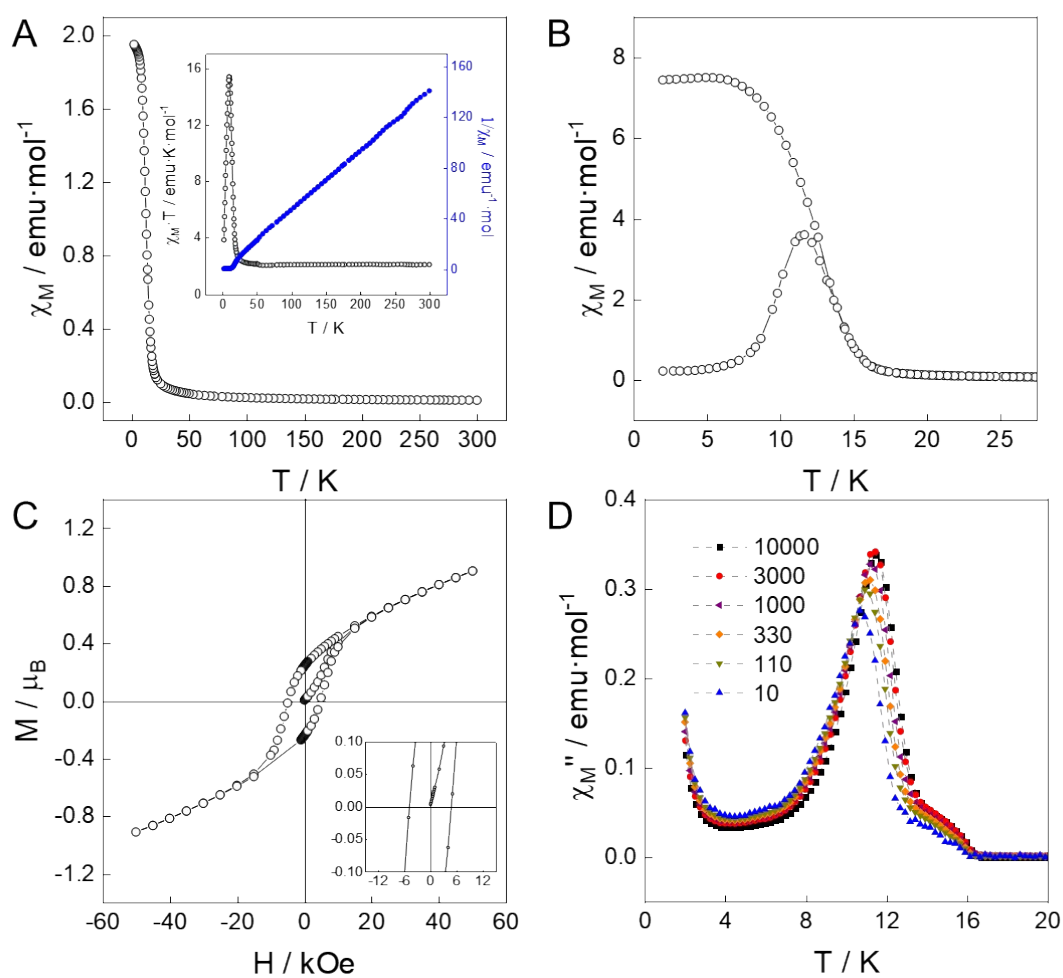

**Figure S6.** Magnetic properties of the NiFe-ES sample. (A)  $\chi_M$  vs. T with an external applied field of 1000 Oe. The inset represents the thermal dependence of  $\chi_M \cdot T$  and the fitting of the  $\chi_M^{-1}$  to a Curie–Weiss law; (B) FC/ZFC with an external applied field of 100 Oe. (C) Hysteresis cycle at 2 K. The inset shows a zoom of the low field region; (D) frequency dependence with the temperature for the out-of-phase ( $\chi_M''$ ) signals at 10, 110, 330, 1000, 3000 and 100000 Hz.

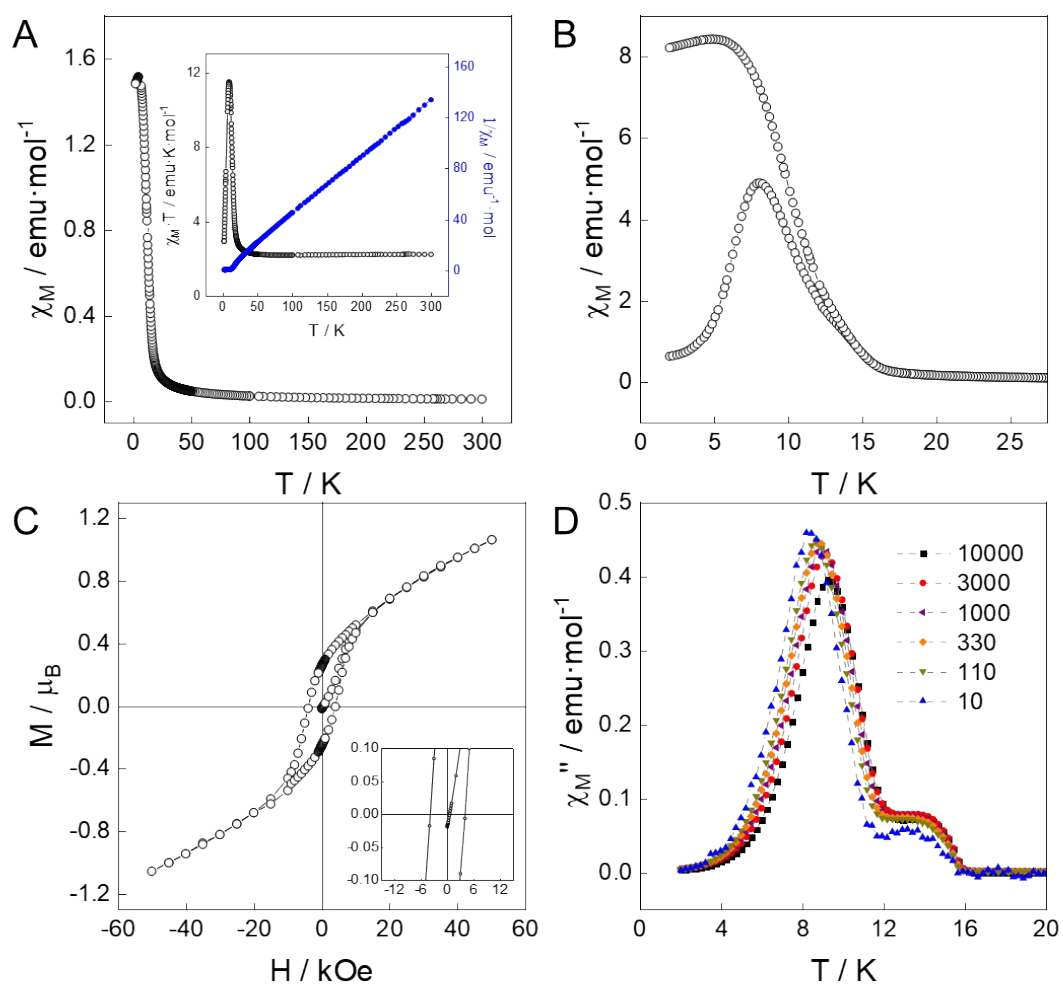

**Figure S7.** Magnetic properties of the NiFe-OS sample. (A)  $\chi_M$  vs. T with an external applied field of 1000 Oe. The inset represents the thermal dependence of  $\chi_M \cdot T$  and the fitting of the  $\chi_M - 1$  to a Curie–Weiss law; (B) FC/ZFC with an external applied field of 100 Oe. (C) Hysteresis cycle at 2 K. The inset shows a zoom of the low field region; (D) frequency dependence with the temperature for the out-of-phase ( $\chi_M''$ ) signals at 10, 110, 330, 1000, 3000 and 100000 Hz.

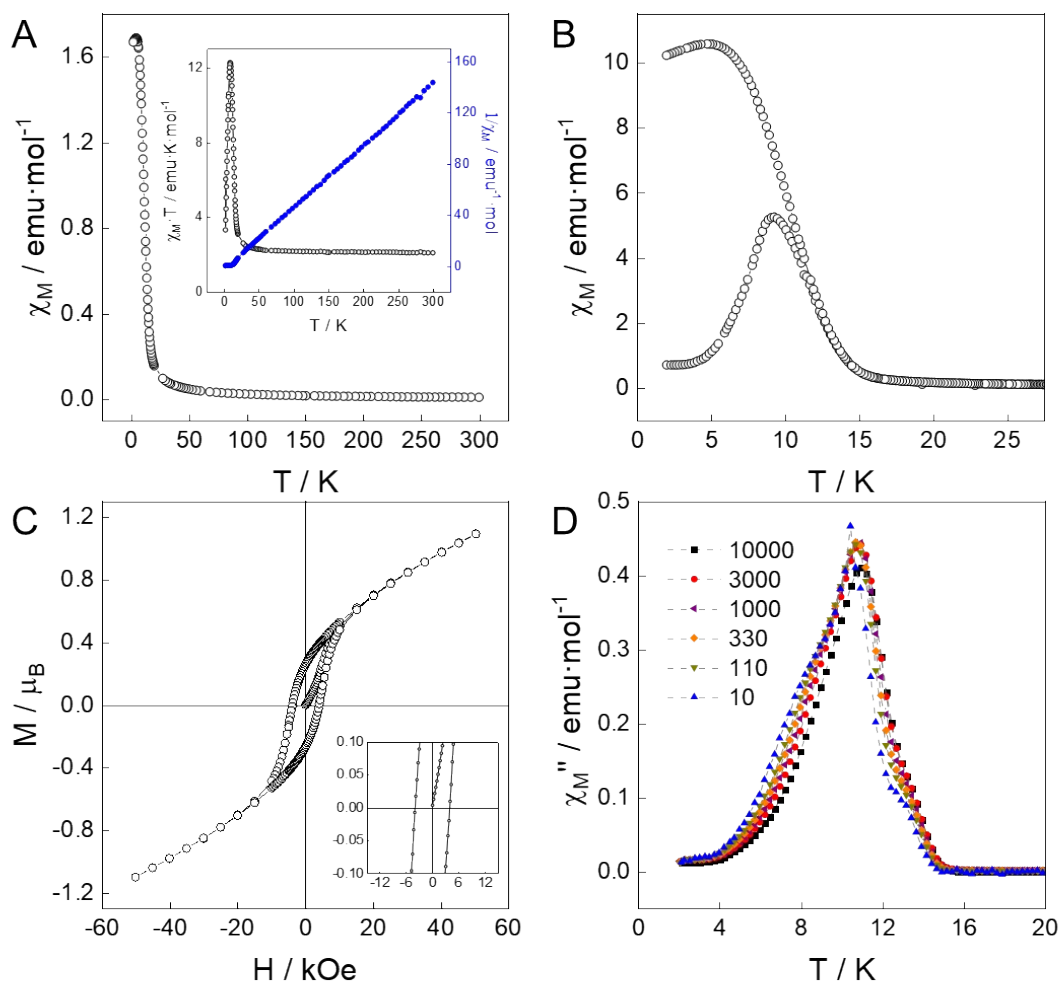

**Figure S8.** Magnetic properties of the NiFe-DS sample. (A)  $\chi_M$  vs. T with an external applied field of 1000 Oe. The inset represents the thermal dependence of  $\chi_M \cdot T$  and the fitting of the  $\chi_M - 1$  to a Curie–Weiss law; (B) FC/ZFC with an external applied field of 100 Oe. (C) Hysteresis cycle at 2 K. The inset shows a zoom of the low field region; (D) frequency dependence with the temperature for the out-of-phase ( $\chi_M''$ ) signals at 10, 110, 330, 1000, 3000 and 10000 Hz.

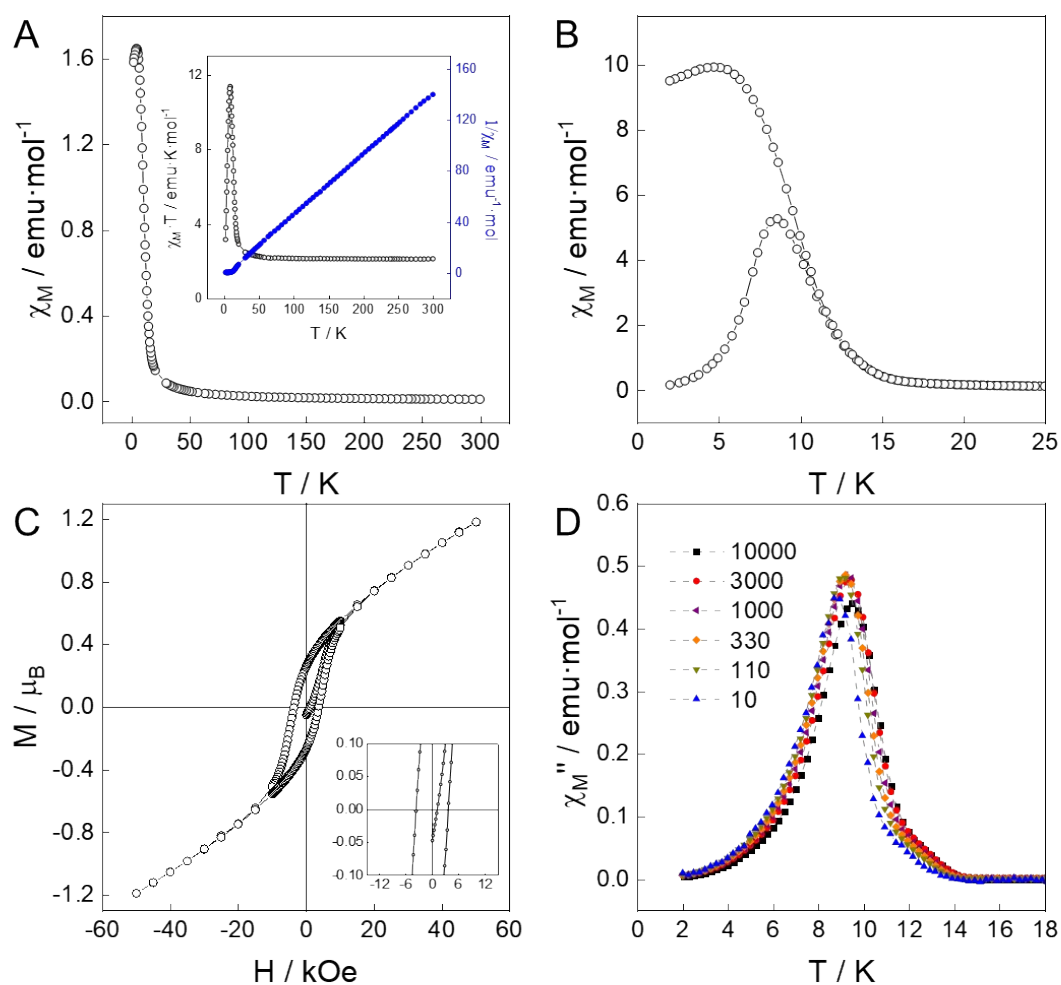

**Figure S9.** Magnetic properties of the NiFe-HDS sample. (A)  $\chi_M$  vs. T with an external applied field of 1000 Oe. The inset represents the thermal dependence of  $\chi_M \cdot T$  and the fitting of the  $\chi_M - 1$  to a Curie–Weiss law; (B) FC/ZFC with an external applied field of 100 Oe. (C) Hysteresis cycle at 2 K. The inset shows a zoom of the low field region; (D) frequency dependence with the temperature for the out-of-phase ( $\chi_M''$ ) signals at 10, 110, 330, 1000, 3000 and 10000 Hz.

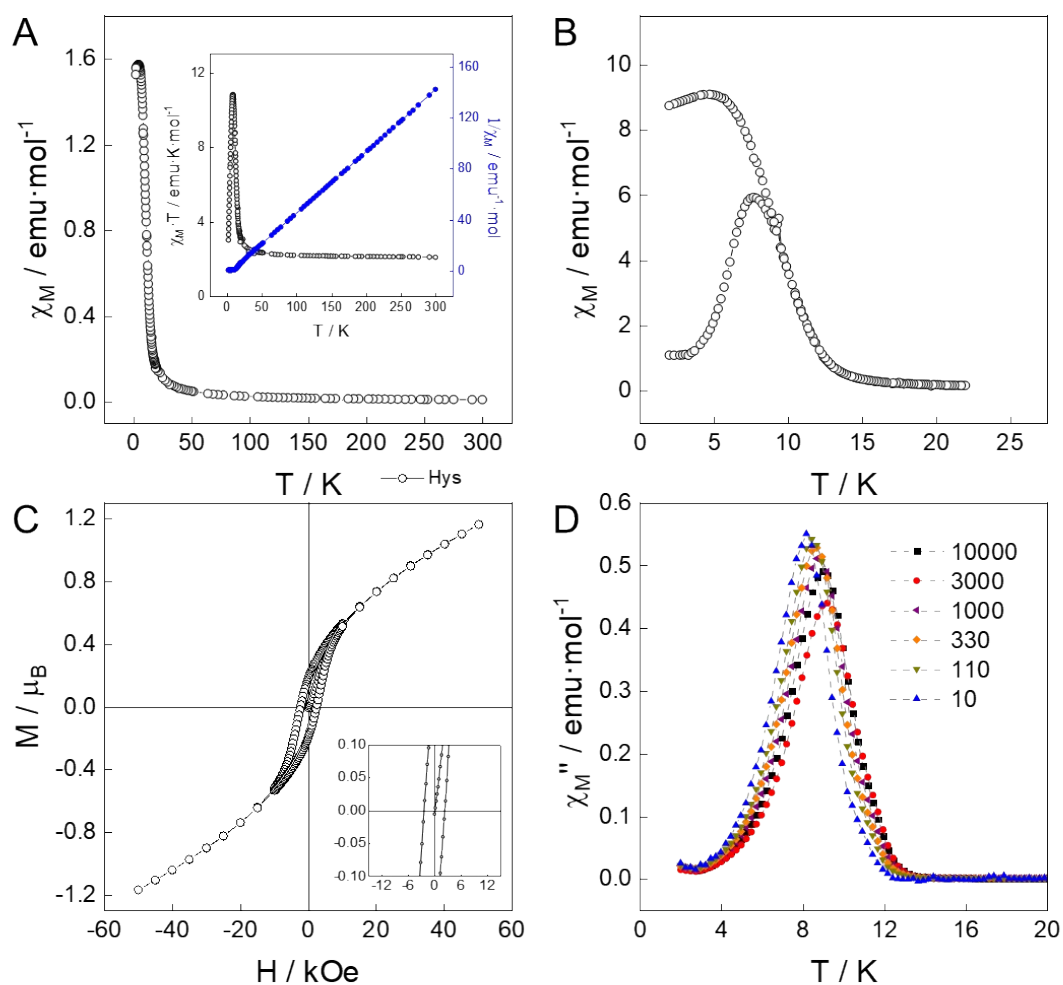

**Figure S10.** Magnetic properties of the NiFe-ODS sample. (A)  $\chi_M$  vs. T with an external applied field of 1000 Oe. The inset represents the thermal dependence of  $\chi_M \cdot T$  and the fitting of the  $\chi_M^{-1}$  to a Curie–Weiss law; (B) FC/ZFC with an external applied field of 100 Oe. (C) Hysteresis cycle at 2 K. The inset shows a zoom of the low field region; (D) frequency dependence with the temperature for the out-of-phase ( $\chi_M''$ ) signals at 10, 110, 330, 1000, 3000 and 10000 Hz.

**Table S2.** Probability  $P(m)$  of finding  $m$  Ni<sup>II</sup> nearest neighbours of Fe<sup>III</sup> according to the binomial distribution (eq.[1])

| compound | $y$ | P(6)  | P(5)  | P(4)  | P(3)  | P(2)  | P( $m \leq 1$ ) |
|----------|-----|-------|-------|-------|-------|-------|-----------------|
| NiFe-Cl  | 2.7 | 0.152 | 0.337 | 0.310 | 0.152 | 0.042 | <0.007          |
| NiFe-ODS | 2.8 | 0.164 | 0.346 | 0.304 | 0.142 | 0.038 | <0.006          |

**Table S3.** Sextet relative areas  $I(m)$  expected for a completely random cation distribution

| compound | $I(6)$ | $I(5)$ | $I(4)$ | $I(m \leq 3)$ | - |
|----------|--------|--------|--------|---------------|---|
| NiFe-Cl  | 15%    | 34%    | 31%    | 20%           | - |
| NiFe-ODS | 16%    | 35%    | 30%    | 19%           |   |

**Table S4.** Estimated parameters from the Mössbauer spectra taken at different temperatures

| sample     | Ni:Fe<br>d | T     | IS   | QS   | B <sub>hf</sub> | I (%) | <B <sub>hf</sub> > |
|------------|------------|-------|------|------|-----------------|-------|--------------------|
| NiFe - Cl  | 2.7        | 295 K | 0.35 | 0.51 | -               | 100   |                    |
| NiFe - Cl  | 7.8 Å      | 4 K   | 0.48 | 0.44 | 52.9            | 55    | 50.7               |
|            |            |       | 0.47 | 0.30 | 50.3            | 21    |                    |
|            |            |       | 0.47 | 0.17 | 47.4            | 15    |                    |
|            |            |       | 0.45 | 0.12 | 44.0            | 9     |                    |
| NiFe - ODS | 2.8        | 295K  | 0.35 | 0.52 | -               | 100   |                    |
| NiFe - ODS | 32 Å       | 4K    | 0.48 | 0.39 | 52.4            | 41    | 49.5               |
|            |            |       | 0.49 | 0.20 | 49.8            | 26    |                    |
|            |            |       | 0.47 | 0.17 | 47.0            | 20    |                    |
|            |            |       | 0.47 | 0.11 | 43.3            | 13    |                    |

---

d interlamellar spacing

IS (mm/s) isomer shift relative to metallic  $\alpha$ -Fe at 295 K; QS (mm/s) average quadrupole splitting estimated for distribution of quadrupole doublets;  $\epsilon$  (mm/s) quadrupole shift estimated for magnetic sextets. B<sub>hf</sub> (tesla) magnetic hyperfine field; I relative areas. Estimated errors  $\leq 0.02$  mm/s for IS, QS,  $\epsilon$ ,  $< 0.2$  T for B<sub>hf</sub> and  $< 2\%$  for I.

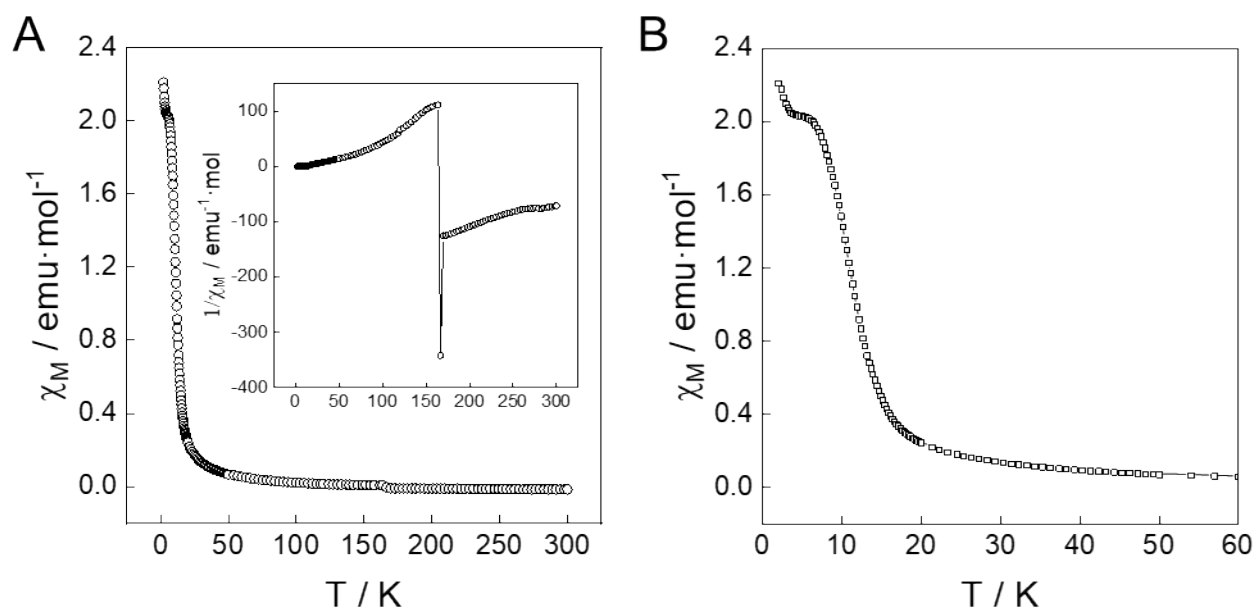

**Figure S12.**  $\chi_M$  vs. T with an external applied field of 1000 Oe for NiFe-Cl exfoliated in formamide.



- 1 L.-J. Zhou, X. Huang, H. Chen, P. Jin, G.-D. Li and X. Zou, *Dalton Transactions*, 2015, **44**, 11592–11600.
- 2 L. Dang, H. Liang, J. Zhuo, B. K. Lamb, H. Sheng, Y. Yang and S. Jin, *Chemistry of Materials*, 2018, **30**, 4321–4330.
- 3 J. A. Carrasco, S. Cardona-Serra, J. M. Clemente-Juan, A. Gaita-Ariño, G. Abellán and E. Coronado, *Inorganic Chemistry*, 2018, **57**, 2013–2022.
- 4 J. W. Lee, W. C. Choi and J.-D. Kim, *CrystEngComm*, 2010, **12**, 3249.
- 5 R. B. Viana, A. B. F. da Silva and A. S. Pimentel, *Advances in Physical Chemistry*, 2012, **2012**, 1–14.
